# Supplementary material for: Assessment of the Breeding Potential of a Set of Genotypes Selected from a Natural Population of Akebia trifoliata (Three–Leaf Akebia)
Source: MDPI journal article supplement (doi:10.3390/horticulturae8020116), 2022-01-27

**Supplemental Table S1.** Statistical values of microsatellite markers on 29 genotypes of *A. trifoliata*

| Locus | Na* | Ne*   | I*    | He*   | Ho    | Nei** | PIC   |
|-------|-----|-------|-------|-------|-------|-------|-------|
| AK1   | 10  | 8.087 | 2.185 | 0.892 | 0.035 | 0.876 | 0.864 |
| AK2   | 10  | 4.380 | 1.743 | 0.785 | 0.000 | 0.772 | 0.740 |
| AK3   | 8   | 3.630 | 1.601 | 0.738 | 0.000 | 0.725 | 0.696 |
| AK4   | 7   | 4.847 | 1.708 | 0.808 | 0.000 | 0.794 | 0.764 |
| AK6   | 11  | 4.621 | 1.786 | 0.797 | 0.000 | 0.784 | 0.752 |
| AK7   | 14  | 7.063 | 2.213 | 0.874 | 0.071 | 0.858 | 0.844 |
| AK8   | 8   | 4.522 | 1.652 | 0.793 | 0.000 | 0.779 | 0.744 |
| AK9   | 9   | 5.515 | 1.847 | 0.833 | 0.069 | 0.819 | 0.794 |
| AK11  | 11  | 8.167 | 2.208 | 0.899 | 0.000 | 0.878 | 0.865 |
| AK12  | 8   | 3.921 | 1.687 | 0.758 | 0.069 | 0.745 | 0.721 |
| AK14  | 15  | 8.327 | 2.365 | 0.895 | 0.000 | 0.880 | 0.869 |
| AK15  | 6   | 3.867 | 1.495 | 0.754 | 0.000 | 0.741 | 0.700 |
| AK16  | 6   | 3.431 | 1.436 | 0.721 | 0.143 | 0.709 | 0.667 |
| AK17  | 11  | 4.195 | 1.749 | 0.775 | 0.035 | 0.762 | 0.730 |
| AK18  | 6   | 4.667 | 1.605 | 0.800 | 0.000 | 0.786 | 0.751 |
| AK19  | 12  | 5.780 | 2.047 | 0.842 | 0.035 | 0.827 | 0.808 |
| AK20  | 4   | 3.166 | 1.257 | 0.698 | 0.115 | 0.684 | 0.630 |
| AK21  | 6   | 3.508 | 1.444 | 0.728 | 0.000 | 0.715 | 0.676 |
| AK22  | 5   | 2.576 | 1.094 | 0.623 | 0.000 | 0.612 | 0.536 |
| AK23  | 8   | 3.155 | 1.396 | 0.696 | 0.000 | 0.683 | 0.630 |
| AK24  | 10  | 5.608 | 1.917 | 0.837 | 0.000 | 0.822 | 0.798 |
| AK25  | 6   | 2.641 | 1.165 | 0.632 | 0.000 | 0.621 | 0.548 |
| AK26  | 9   | 4.885 | 1.801 | 0.810 | 0.000 | 0.795 | 0.769 |
| AK27  | 6   | 3.124 | 1.276 | 0.692 | 0.071 | 0.680 | 0.621 |

|      |    |       |       |       |       |       |       |
|------|----|-------|-------|-------|-------|-------|-------|
| AK28 | 2  | 2.000 | 0.693 | 1.000 | 0.000 | 0.500 | 0.375 |
| AK29 | 7  | 4.810 | 1.724 | 0.807 | 0.000 | 0.792 | 0.763 |
| AK30 | 1  | 1.000 | 0.000 | 0.000 | 1.000 | 0.000 | 0.000 |
| AK31 | 3  | 2.147 | 0.825 | 0.544 | 0.000 | 0.534 | 0.426 |
| AK10 | 6  | 2.731 | 1.195 | 0.645 | 0.000 | 0.634 | 0.564 |
| AK32 | 2  | 1.998 | 0.693 | 0.508 | 0.035 | 0.499 | 0.375 |
| AK33 | 7  | 4.335 | 1.587 | 0.783 | 0.000 | 0.769 | 0.732 |
| AK34 | 5  | 3.156 | 1.281 | 0.695 | 0.035 | 0.683 | 0.626 |
| AK35 | 6  | 2.532 | 1.124 | 0.617 | 0.000 | 0.605 | 0.526 |
| AK36 | 2  | 1.071 | 0.150 | 0.068 | 1.000 | 0.067 | 0.064 |
| AK37 | 6  | 5.452 | 1.736 | 0.849 | 0.231 | 0.817 | 0.790 |
| AK38 | 7  | 2.908 | 1.282 | 0.669 | 0.000 | 0.656 | 0.594 |
| AK39 | 9  | 4.991 | 1.832 | 0.814 | 0.035 | 0.800 | 0.776 |
| AK40 | 12 | 6.230 | 2.044 | 0.856 | 0.000 | 0.840 | 0.820 |
| AK41 | 4  | 2.420 | 1.038 | 0.612 | 0.750 | 0.587 | 0.515 |
| AK42 | 4  | 1.810 | 0.760 | 0.456 | 0.962 | 0.448 | 0.377 |
| AK43 | 8  | 2.694 | 1.252 | 0.640 | 0.000 | 0.629 | 0.559 |
| AK44 | 7  | 3.641 | 1.504 | 0.738 | 0.035 | 0.725 | 0.681 |
| AK45 | 9  | 2.730 | 1.292 | 0.646 | 0.037 | 0.634 | 0.565 |
| AK46 | 6  | 3.299 | 1.389 | 0.710 | 0.037 | 0.697 | 0.650 |
| AK47 | 4  | 2.402 | 1.000 | 0.595 | 0.000 | 0.584 | 0.495 |
| AK48 | 5  | 2.522 | 1.088 | 0.615 | 0.000 | 0.604 | 0.523 |
| AK49 | 4  | 3.200 | 1.256 | 0.786 | 0.000 | 0.688 | 0.630 |
| AK50 | 4  | 2.148 | 0.847 | 0.544 | 0.000 | 0.534 | 0.426 |
| AK51 | 1  | 1.000 | 0.000 | 0.000 | 1.000 | 0.000 | 0.000 |
| AK52 | 3  | 2.074 | 0.772 | 0.528 | 0.037 | 0.518 | 0.402 |

|      |    |       |       |       |       |       |       |
|------|----|-------|-------|-------|-------|-------|-------|
| AK54 | 12 | 6.451 | 2.067 | 0.861 | 0.000 | 0.845 | 0.827 |
| AK55 | 3  | 2.616 | 1.025 | 0.629 | 0.000 | 0.618 | 0.545 |
| AK56 | 7  | 3.226 | 1.344 | 0.703 | 0.185 | 0.690 | 0.633 |
| AK57 | 10 | 4.528 | 1.755 | 0.794 | 0.000 | 0.779 | 0.747 |
| AK58 | 9  | 5.152 | 1.839 | 0.821 | 0.000 | 0.806 | 0.782 |
| AK59 | 2  | 1.998 | 0.693 | 0.508 | 0.036 | 0.499 | 0.375 |
| AK60 | 6  | 3.204 | 1.334 | 0.701 | 0.000 | 0.688 | 0.634 |
| AK61 | 3  | 2.620 | 1.026 | 0.631 | 0.039 | 0.618 | 0.546 |
| AK62 | 7  | 2.921 | 1.347 | 0.671 | 0.280 | 0.658 | 0.609 |
| AK63 | 10 | 3.806 | 1.641 | 0.751 | 0.000 | 0.737 | 0.701 |
| AK64 | 10 | 4.273 | 1.744 | 0.780 | 0.000 | 0.766 | 0.734 |
| AK65 | 6  | 2.577 | 1.149 | 0.625 | 0.000 | 0.612 | 0.536 |
| AK66 | 8  | 5.930 | 1.905 | 0.865 | 0.385 | 0.831 | 0.810 |
| AK67 | 9  | 3.482 | 1.533 | 0.725 | 0.069 | 0.713 | 0.669 |
| AK68 | 8  | 2.618 | 1.215 | 0.630 | 0.000 | 0.618 | 0.544 |
| AK69 | 7  | 3.618 | 1.462 | 0.737 | 0.000 | 0.724 | 0.678 |
| AK70 | 6  | 2.991 | 1.261 | 0.679 | 0.000 | 0.666 | 0.608 |
| AK71 | 8  | 3.811 | 1.674 | 0.753 | 0.440 | 0.738 | 0.714 |
| AK72 | 5  | 2.831 | 1.205 | 0.659 | 0.037 | 0.647 | 0.590 |
| AK73 | 2  | 1.461 | 0.495 | 0.321 | 0.607 | 0.316 | 0.266 |
| AK74 | 4  | 2.233 | 0.904 | 0.563 | 0.037 | 0.552 | 0.451 |
| AK75 | 6  | 3.198 | 1.354 | 0.699 | 0.241 | 0.687 | 0.633 |
| AK76 | 5  | 2.269 | 1.085 | 0.582 | 0.385 | 0.559 | 0.511 |
| AK77 | 2  | 1.932 | 0.676 | 0.498 | 0.188 | 0.482 | 0.366 |
| AK78 | 4  | 2.129 | 0.849 | 0.541 | 0.077 | 0.530 | 0.426 |
| AK79 | 9  | 3.089 | 1.443 | 0.689 | 0.037 | 0.676 | 0.622 |

|      |       |       |       |       |       |       |       |
|------|-------|-------|-------|-------|-------|-------|-------|
| AK80 | 2     | 2.000 | 0.693 | 0.510 | 0.000 | 0.500 | 0.375 |
| AK81 | 6     | 3.853 | 1.501 | 0.754 | 0.000 | 0.740 | 0.699 |
| AK82 | 4     | 2.314 | 0.957 | 0.579 | 0.037 | 0.568 | 0.474 |
| AK83 | 3     | 2.541 | 1.009 | 0.621 | 0.046 | 0.606 | 0.535 |
| AK84 | 7     | 3.424 | 1.477 | 0.721 | 0.000 | 0.708 | 0.671 |
| AK85 | 2     | 1.125 | 0.224 | 0.114 | 1.000 | 0.111 | 0.105 |
| Mean | 6.488 | 3.527 | 1.328 | 0.672 | 0.121 | 0.652 | 0.600 |

**Supplemental Table S2.** The characterized of 29 genotypes in 19 phenotypic traits and nutritional components of *A. trifoliata*.

| Strain | Ripe<br>ning<br>date | Fruit color   | Fruit<br>shape | Fruit<br>weight<br>(g) | Peel<br>weight<br>(g) | Peric<br>arp<br>thick<br>ness<br>(cm) | Longit<br>udinal<br>diamet<br>er<br>(cm) | Transv<br>erse<br>diamet<br>er<br>(cm) | Seed<br>weight<br>(g) | Propor<br>tion of<br>seeds<br>(%) | Seed/p<br>ulp<br>(%) | Edible<br>proporti<br>on<br>(%) | Vita<br>min<br>C<br>(mg/1<br>00g) | Reducin<br>g sugar<br>(g/100g) | Prot<br>ein<br>(g/10<br>0g) | Total<br>flavo<br>noids<br>(mg/<br>g) | Titra<br>table<br>acid<br>(g/10<br>0g) | HAAta<br>tal<br>(ng/mg<br>) | TotalFA<br>A<br>(ng/mg) |
|--------|----------------------|---------------|----------------|------------------------|-----------------------|---------------------------------------|------------------------------------------|----------------------------------------|-----------------------|-----------------------------------|----------------------|---------------------------------|-----------------------------------|--------------------------------|-----------------------------|---------------------------------------|----------------------------------------|-----------------------------|-------------------------|
| 78     | 9.07                 | Fuchsia       | Pyriform       | 222.76                 | 188.52                | 1.22                                  | 12.49                                    | 6.19                                   | 7.95                  | 3.71                              | 34.95                | 12.47                           | 8.84                              | 12.5                           | 0.49                        | 1.54                                  | 0.043                                  | 3163.33                     | 963.28                  |
| 209    | 9.20                 | Lavenderblush | Bnana like     | 227.04                 | 174.52                | 1.16                                  | 13.52                                    | 5.68                                   | 9.79                  | 4.32                              | 24.13                | 18.83                           | 25.04                             | 15.46                          | 0.44                        | 1.26                                  | 0.039                                  | 2430.00                     | 312.39                  |
| 388    | 9.15                 | Fuchsia       | Spindle        | 245.00                 | 176.33                | 0.96                                  | 12.17                                    | 6.27                                   | 8.21                  | 3.37                              | 13.77                | 24.70                           | 8.87                              | 13.4                           | 0.47                        | 3.69                                  | 0.045                                  | 2940.00                     | 863                     |
| 422    | 9.20                 | Lavenderblush | Spindle        | 232.87                 | 161.88                | 1.12                                  | 13.29                                    | 6.20                                   | 8.57                  | 3.73                              | 13.98                | 27.11                           | 24.84                             | 14.4                           | 0.46                        | 4.18                                  | 0.066                                  | 3940.00                     | 495.34                  |
| 516    | 9.07                 | PalevioletRed | Bnana like     | 190.44                 | 161.07                | 1.11                                  | 11.21                                    | 5.75                                   | 7.92                  | 4.27                              | 73.46                | 10.75                           | 8.64                              | 8.71                           | 0.53                        | 2.6                                   | 0.06                                   | 3806.67                     | 1234.33                 |
| 548    | 9.25                 | Fuchsia       | Spindle        | 228.75                 | 168.93                | 1.16                                  | 12.81                                    | 6.10                                   | 8.76                  | 3.85                              | 17.46                | 23.05                           | 25.48                             | 16.28                          | 0.47                        | 1.08                                  | 0.076                                  | 2990.00                     | 684.15                  |
| 665    | 9.21                 | Fuchsia       | Spindle        | 188.79                 | 135.34                | 1.17                                  | 12.04                                    | 5.83                                   | 8.21                  | 3.80                              | 19.54                | 23.96                           | 22.13                             | 16.07                          | 0.43                        | 3.54                                  | 0.063                                  | 2943.33                     | 481.91                  |
| 679    | 9.11                 | Fuchsia       | Spindle        | 233.85                 | 179.55                | 1.20                                  | 12.80                                    | 6.00                                   | 10.44                 | 4.45                              | 24.05                | 18.75                           | 11.23                             | 11.32                          | 0.52                        | 2.75                                  | 0.057                                  | 3580.00                     | 493.84                  |

|      |      |               |            |        |        |      |       |      |       |      |       |       |       |       |      |       |       |         |         |
|------|------|---------------|------------|--------|--------|------|-------|------|-------|------|-------|-------|-------|-------|------|-------|-------|---------|---------|
| 710  | 8.29 | Lavenderblush | Neohroid   | 446.90 | 354.35 | 1.28 | 16.30 | 6.97 | 16.32 | 3.66 | 21.78 | 20.48 | 40.45 | 10.16 | 0.67 | 1.84  | 0.06  | 3535.83 | 632.16  |
| 713  | 9.17 | Fuchsia       | Bnana like | 234.67 | 174.04 | 1.07 | 12.82 | 6.14 | 8.16  | 3.48 | 15.68 | 22.40 | 10.43 | 11.76 | 0.34 | 1.2   | 0.062 | 3553.33 | 759.69  |
| 725  | 9.12 | Fuchsia       | Neohroid   | 262.08 | 199.13 | 0.97 | 12.89 | 5.83 | 8.73  | 3.38 | 21.83 | 20.82 | 8.13  | 10.07 | 0.52 | 1.09  | 0.069 | 3566.67 | 944.19  |
| 743  | 9.20 | Fuchsia       | Neohroid   | 214.57 | 145.96 | 1.12 | 12.39 | 5.91 | 7.22  | 3.38 | 14.01 | 28.24 | 24.68 | 12.56 | 0.48 | 1.61  | 0.064 | 3090.00 | 531.8   |
| 750  | 9.15 | PalevioletRed | Neohroid   | 255.89 | 185.17 | 1.11 | 12.97 | 5.98 | 8.19  | 3.27 | 13.52 | 24.42 | 15.81 | 10.22 | 0.44 | 2.11  | 0.06  | 2866.67 | 482.82  |
| 752  | 9.20 | Lavenderblush | Spindle    | 237.31 | 175.33 | 1.19 | 13.18 | 6.16 | 7.76  | 5.15 | 15.08 | 22.53 | 24.76 | 11.93 | 0.45 | 3.16  | 0.051 | 3150.00 | 380.74  |
| 761  | 9.21 | Fuchsia       | Neohroid   | 199.67 | 144.15 | 1.06 | 12.54 | 6.28 | 8.91  | 4.48 | 19.28 | 23.60 | 22.38 | 18.22 | 0.48 | 2.16  | 0.05  | 3585.00 | 1205.73 |
| 780  | 9.05 | PalevioletRed | Neohroid   | 277.32 | 211.06 | 1.31 | 13.68 | 6.28 | 13.27 | 4.79 | 25.21 | 19.21 | 7.67  | 8.95  | 0.32 | 1.65  | 0.058 | 1663.33 | 745.74  |
| 857  | 9.11 | PalevioletRed | Neohroid   | 135.15 | 100.48 | 0.84 | 10.12 | 5.35 | 6.15  | 4.59 | 21.68 | 21.25 | 14.68 | 11.28 | 0.51 | 2.68  | 0.063 | 2135.40 | 626.56  |
| 878  | 9.11 | Fuchsia       | Spindle    | 195.28 | 151.24 | 1.02 | 11.95 | 5.67 | 10.29 | 5.73 | 32.94 | 17.28 | 6.72  | 10.95 | 0.49 | 1.47  | 0.072 | 3196.67 | 826.63  |
| 882  | 9.18 | PalevioletRed | Bnana like | 292.56 | 206.27 | 1.18 | 14.00 | 6.69 | 9.65  | 3.33 | 12.69 | 26.35 | 10.5  | 17.67 | 0.58 | 1.14  | 0.054 | 3806.67 | 926.91  |
| 1002 | 9.11 | PalevioletRed | Bnana like | 213.68 | 161.44 | 1.08 | 12.10 | 5.71 | 10.37 | 4.87 | 25.10 | 19.56 | 10.71 | 10.85 | 0.51 | 3.19  | 0.064 | 3475.00 | 1144.32 |
| 1004 | 9.07 | PalevioletRed | Neohroid   | 195.59 | 165.97 | 1.10 | 11.51 | 5.56 | 8.53  | 4.36 | 52.36 | 10.74 | 7.57  | 8.78  | 0.52 | 2.63  | 0.066 | 3443.33 | 1443.07 |
| 1023 | 9.28 | Darkorchid    | Neohroid   | 280.45 | 187.79 | 0.69 | 14.32 | 7.57 | 20.20 | 7.19 | 28.14 | 25.99 | 27.56 | 17.41 | 0.49 | 14.28 | 0.053 | 3486.67 | 455.47  |
| 1054 | 9.20 | PalevioletRed | Neohroid   | 198.17 | 134.81 | 1.02 | 12.73 | 5.79 | 7.98  | 4.05 | 15.27 | 27.80 | 25.42 | 15.03 | 0.42 | 1.01  | 0.059 | 3450.00 | 518.92  |
| 1062 | 9.21 | PalevioletRed | Bnana like | 181.92 | 130.61 | 0.97 | 11.64 | 5.49 | 9.11  | 5.12 | 22.75 | 23.83 | 14.7  | 12.63 | 0.38 | 2.07  | 0.074 | 2135.00 | 504.51  |
| 1314 | 9.11 | PalevioletRed | Bnana like | 252.45 | 192.96 | 0.99 | 13.29 | 6.63 | 9.55  | 3.76 | 19.83 | 19.89 | 9.7   | 17.72 | 0.46 | 1.97  | 0.073 | 2693.33 | 496.25  |
| 1316 | 9.07 | PalevioletRed | Pyriform   | 247.53 | 188.89 | 1.30 | 12.69 | 6.30 | 9.26  | 3.77 | 19.88 | 19.79 | 13.37 | 10.97 | 0.46 | 2.13  | 0.069 | 3460.00 | 846.23  |
| 1356 | 9.20 | PalevioletRed | Neohroid   | 234.40 | 185.37 | 1.08 | 12.98 | 6.08 | 8.94  | 3.87 | 23.05 | 17.27 | 10.64 | 12.15 | 0.54 | 3.54  | 0.048 | 3286.67 | 733.38  |
| 1411 | 9.21 | Cyan purpe    | Spindle    | 331.44 | 215.45 | 0.88 | 15.83 | 7.48 | 14.93 | 4.64 | 18.52 | 29.47 | 54.44 | 13.75 | 0.52 | 29.11 | 0.06  | 3636.67 | 344.49  |
| 1427 | 9.25 | PalevioletRed | Pyriform   | 237.33 | 178.51 | 1.12 | 12.92 | 6.38 | 10.01 | 4.28 | 21.09 | 20.78 | 27.88 | 14.45 | 0.42 | 2.21  | 0.082 | 3060.00 | 407.94  |

**Supplemental Figure S1.** Distributions of VC (vitamin C), TFAA (total free amino acid), RS (reducing sugar), and TF (total flavonoids).

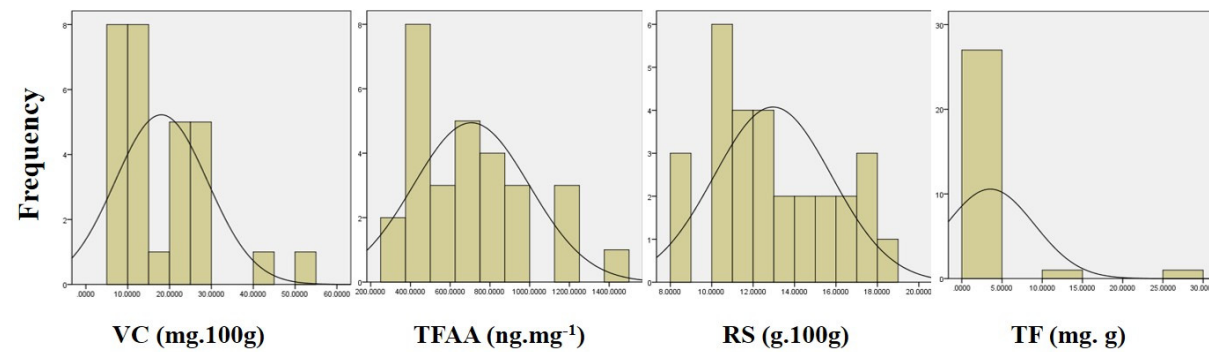

**Supplemental Figure S2.** The scree plot of principal component analysis

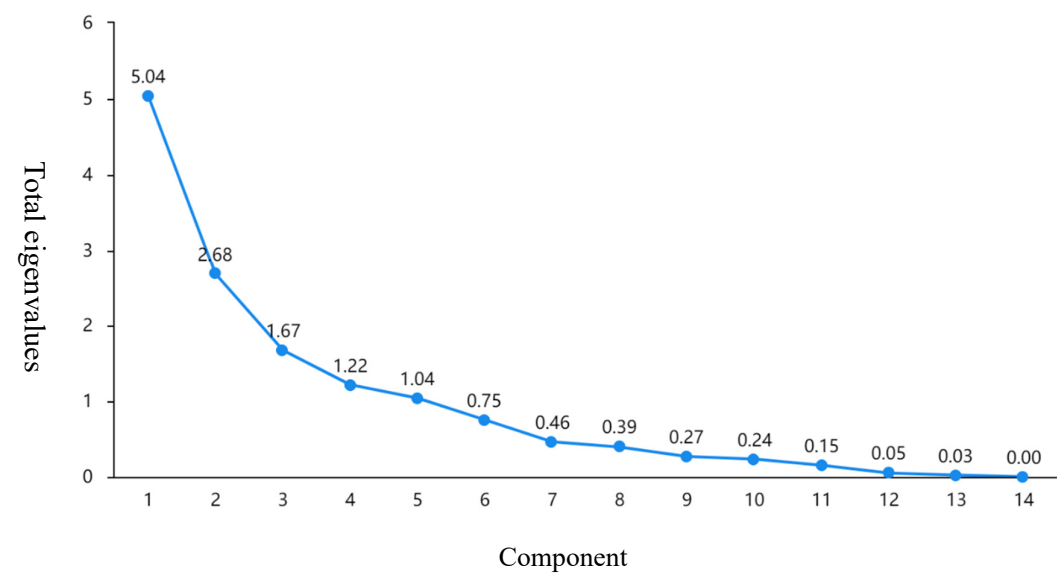

Supplement: s1 [file s1]
